# Supplementary material for: Improved Interfacial Contact for Pyramidal Texturing of Silicon Heterojunction Solar Cells
Source: MDPI journal article supplement (doi:10.3390/molecules27051710), 2022-03-05
Supplement: s1 [file s1]

# Supporting Information

## Improved interfacial contact for pyramidal texturing of silicon heterojunction solar cells

Ruijie Dai <sup>1,2,†</sup>, Tengzuo Huang <sup>1,2,†</sup>, Weijie Zhou <sup>1,2</sup>, Jinpeng Yang <sup>1,2</sup>, Hua Zhang <sup>1,2</sup>, Fayin Yu <sup>1,2</sup>, Anran Chen <sup>1,2,\*</sup>, Feng Wang <sup>1,2</sup>, Jin Zhang <sup>1,2,\*</sup>, Tao Sun <sup>1,2,\*</sup> and Longzhou Zhang <sup>2,\*</sup>

<sup>1</sup> International Joint Research Center for Optoelectronic and Energy Materials, Yunnan University, Kunming, Yunnan 650091, China

<sup>2</sup> School of Materials and Energy, Yunnan University, Kunming 650091, China

\* Correspondence: authors: 20180071@ynu.edu.cn

† Ruijie Dai and Tengzuo Huang contributed equally to this work, should be considered co-first authors.

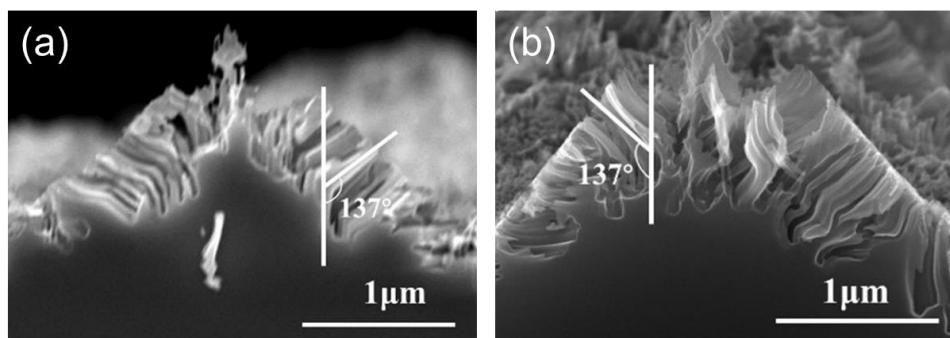

Figure S1. SEM of different AgNO<sub>3</sub> concentrations: (a) 8mM, (b) 9mM

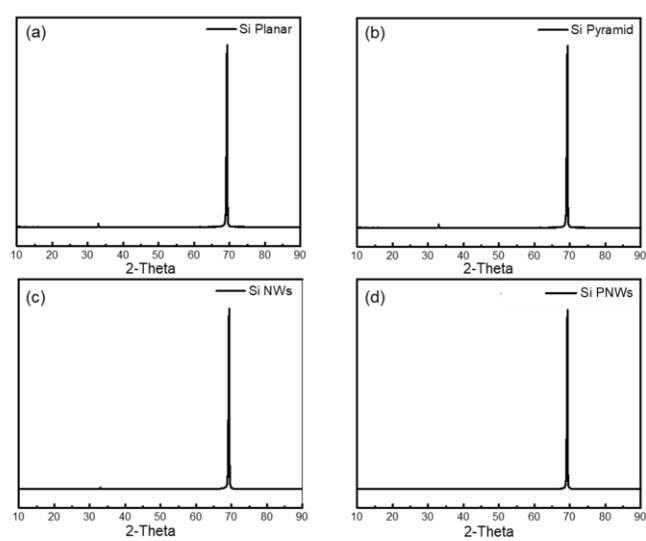

**Figure S2. The XRD of different structure of samples: (a) planar Si, (b) Si pyramid, (c) SiNWs, (d) SiNWs/pyramid.**

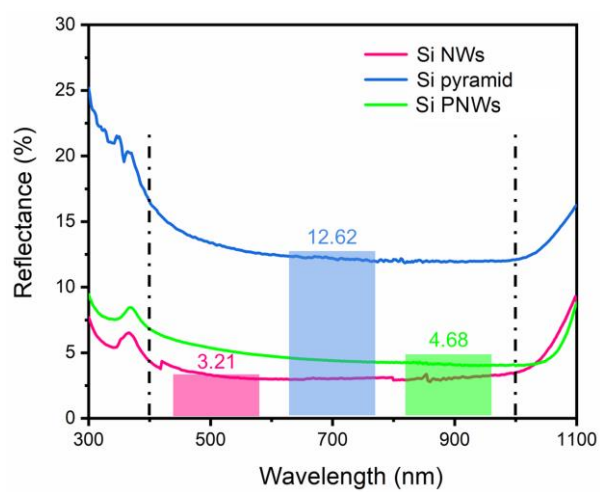

**Figure S3. reflectance spectra of different silicon textures.**
